# Supplementary material for: Improved outcomes in patients with ST-elevation myocardial infarction during the last 20 years are related to implementation of evidence-based treatments: experiences from the SWEDEHEART registry 1995–2014
Source: PubMed Central journal article supplement — Eur Heart J. 2017 Aug 29;38(41):3056–65. doi: 10.1093/eurheartj/ehx515 (PMC5837507; doi:10.1093/eurheartj/ehx515), 2017-08-29
Supplement: ehx515_supplemental_appendix.pdf [file ehx515_supplemental_appendix.pdf]

## **Supplemental appendix**

**Improved outcomes in patients with ST-elevation myocardial infarction during the last 20 years are related to implementation of evidence based treatments – experiences from the SWEDEHEART registry 1995 to 2014.**

Karolina Szummer MD PhD; Lars Wallentin MD PhD; Lars Lindhagen PhD; Joakim Alfredsson MD PhD; David Erlinge MD PhD; Claes Held MD PhD; Stefan James MD PhD; Thomas Kellerth MD; Bertil Lindahl MD PhD; Annica Ravn-Fischer MD PhD; Erik Rydberg MD PhD; Troels Yndigejn MD; Tomas Jernberg MD PhD

| <b>Table of contents</b>                                                                                                              | <b>Page</b> |
|---------------------------------------------------------------------------------------------------------------------------------------|-------------|
| <b>Figure 1s.</b> Flow chart of included patients                                                                                     | <b>3</b>    |
| <b>Figure 2s.</b> Kaplan-Meier curves for long-term outcomes for STEMI cases included from 1995-96 (dark red) to 2013-14 (dark green) | <b>4</b>    |
| <b>Table S1.</b> Endpoint definition and data source                                                                                  | <b>5</b>    |
| <b>Table S2.</b> In hospital investigations, procedures and medical treatments                                                        | <b>6</b>    |
| <b>Table S3.</b> In-hospital, 30-day and 1-year outcomes                                                                              | <b>8</b>    |
| <b>Table S4.</b> Standardized incidence rate ratio (SIR)                                                                              | <b>10</b>   |
| <b>Table S5.</b> Standardized 1-year risk of death, myocardial infarction, and death or myocardial infarction.                        | <b>11</b>   |

**Figure 1s.** Flow chart of included patients

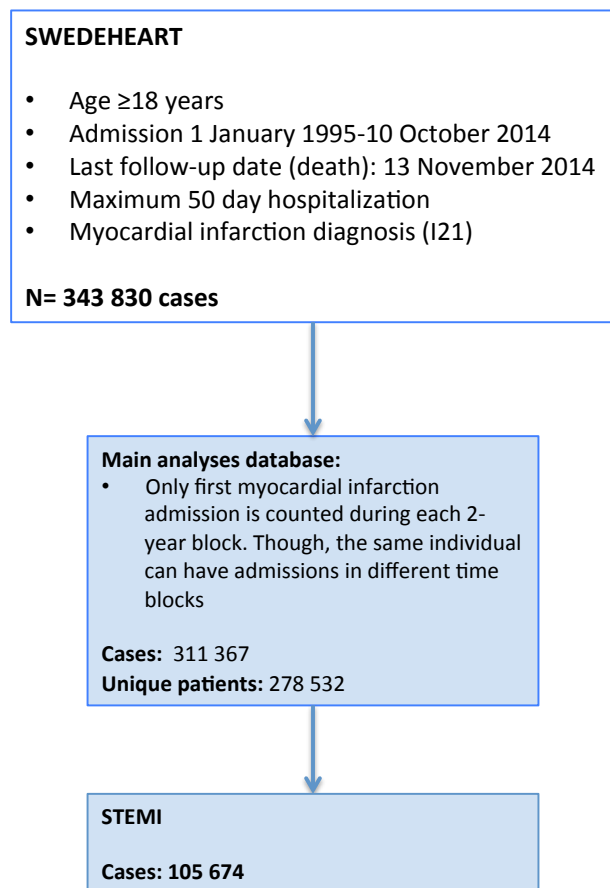

**Figure 2s.** Kaplan-Meier curves for long-term outcomes in STEMI cases included from 1995-96 (dark red) to 2013-14 (dark green). For death, the coloured dashed lines represent the corresponding age-gender and calendar-year matched background population.

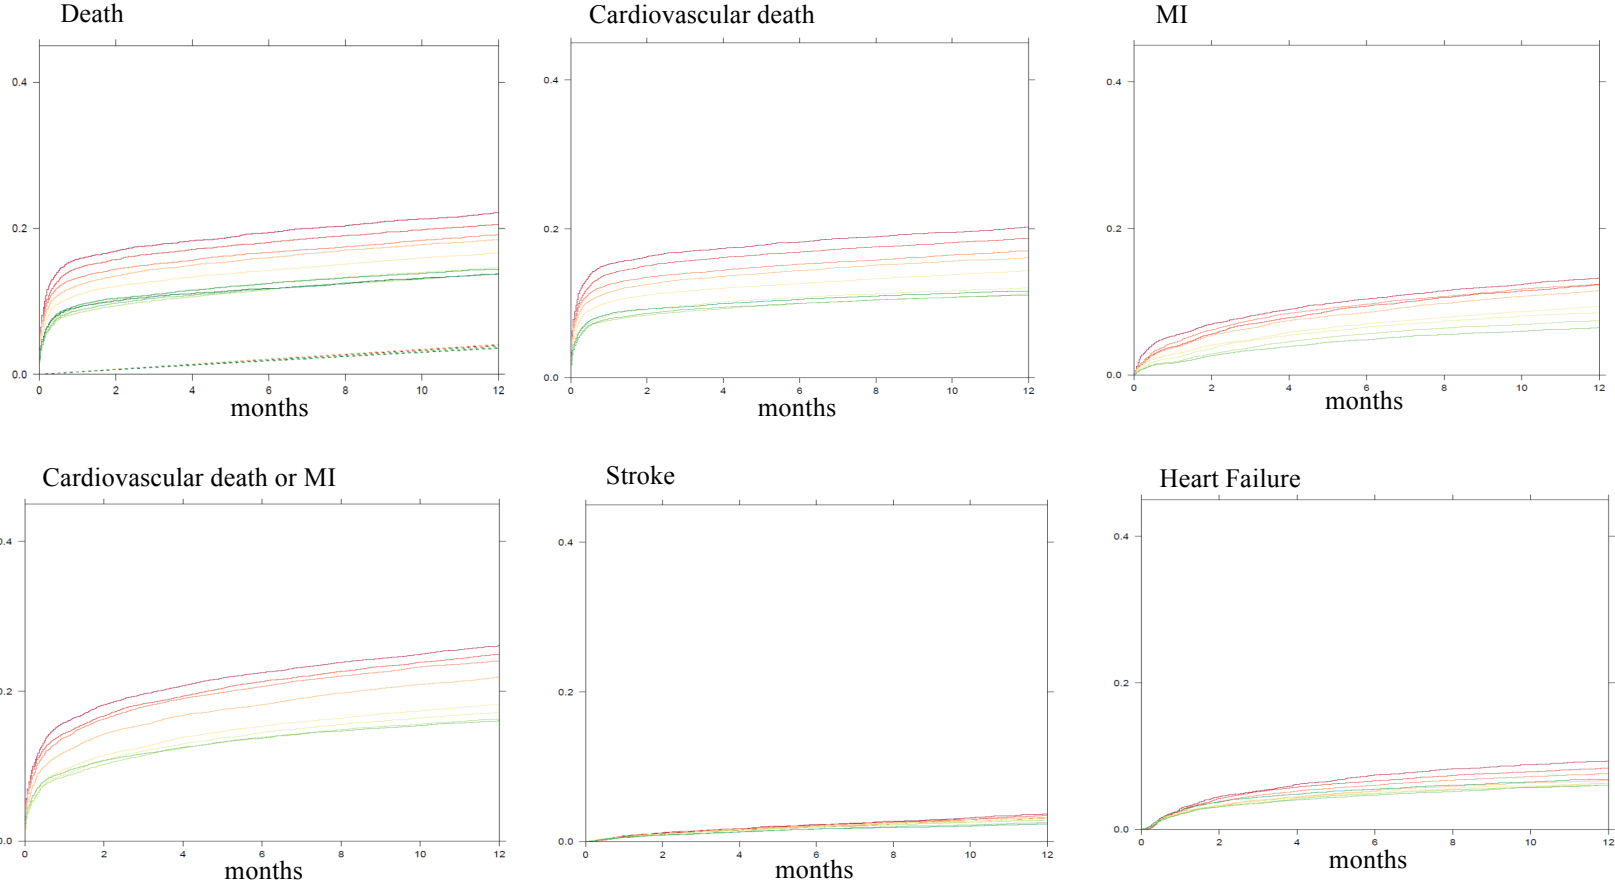

|                     |   |                       |       |
|---------------------|---|-----------------------|-------|
| 1995-1996, Observed | — | 1995-1996, Background | - - - |
| 1997-1998, Observed | — | 1997-1998, Background | - - - |
| 1999-2000, Observed | — | 1999-2000, Background | - - - |
| 2001-2002, Observed | — | 2001-2002, Background | - - - |
| 2003-2004, Observed | — | 2003-2004, Background | - - - |
| 2005-2006, Observed | — | 2005-2006, Background | - - - |
| 2007-2008, Observed | — | 2007-2008, Background | - - - |
| 2009-2010, Observed | — | 2009-2010, Background | - - - |
| 2011-2012, Observed | — | 2011-2012, Background | - - - |
| 2013-2014, Observed | — | 2013-2014, Background | - - - |

**Table S1. Endpoint definition and data source**

| <b>Event</b>                  | <b>Event timing</b>                   | <b>Source</b>                                                                                     | <b>ICD-codes or definition</b>                             |
|-------------------------------|---------------------------------------|---------------------------------------------------------------------------------------------------|------------------------------------------------------------|
| Re-infarction                 | In-hospital                           | SWEDHEART (collected prospectively as part of the protocol)                                       | I21-diagnosis registered in the SWEDHEART registry         |
| Re-infarction                 | 30-day                                | New SWEDHEART myocardial infarction registration (occurring >2 days and ≤30 days after discharge) | I21-diagnosis registered in the SWEDHEART registry         |
| Re-infarction                 | 1-year                                | SWEDHEART for MI ≤30 days after discharge date & Patient-registry for MI >30 days after discharge | ICD-10:I21-I22.<br>ICD-9: 410. 412                         |
| Stroke                        | In-hospital, 30-day and 1-year events | Patient-registry                                                                                  | Ischemic stroke:<br>ICD-10: I63.0-I63.6.<br>ICD-9: 433-436 |
| Heart failure hospitalization | In-hospital, 30-day and 1-year events | National Patient registry; heart failure as main diagnosis only                                   | ICD-10: I50. I110. K761<br>ICD 9: 428                      |
| Death                         | In-hospital, 30-day and 1-year events | Population registry                                                                               | -                                                          |
| Cardiovascular death          | In-hospital, 30-day and 1-year events | National Cause of Death registry                                                                  | ICD-9: 390-459<br>ICD-10: I                                |

**Table S2. In hospital investigations, procedures and medical treatments**

| Variable                       | 1995-1996    | 1997-1998    | 1999-2000    | 2001-2002    | 2003-2004    | 2005-2006    | 2007-2008     | 2009-2010     | 2011-2012     | 2013-2014    | P-value* |
|--------------------------------|--------------|--------------|--------------|--------------|--------------|--------------|---------------|---------------|---------------|--------------|----------|
| N                              | 5567         | 9450         | 11473        | 11657        | 11483        | 11259        | 11628         | 11663         | 11745         | 9749         |          |
| Reperfusion therapies          |              |              |              |              |              |              |               |               |               |              |          |
| Coronary angiography           | 114 (2.0%)   | 516 (5.5%)   | 1453 (12.7%) | 3285 (28.2%) | 6259 (54.5%) | 8711 (77.4%) | 9768 (84.0%)  | 10173 (87.2%) | 10521 (89.6%) | 8968 (92.0%) | <0.001   |
| Reperfusion for STEMI          | 3677 (66.2%) | 6339 (67.2%) | 7706 (67.3%) | 7779 (67.3%) | 7599 (66.8%) | 8143 (72.3%) | 8807 (75.7%)  | 9181 (78.7%)  | 9379 (79.9%)  | 7961 (81.7%) | <0.001   |
| PCI in hospital                | 380 (6.8%)   | 795 (8.4%)   | 1735 (15.1%) | 3133 (26.9%) | 5572 (48.5%) | 7868 (69.9%) | 8860 (76.2%)  | 9403 (80.6%)  | 9917 (84.4%)  | 8536 (87.6%) | <0.001   |
| CABG in hospital               | 49 (0.9%)    | 86 (0.9%)    | 129 (1.1%)   | 178 (1.5%)   | 239 (2.1%)   | 245 (2.2%)   | 206 (1.8%)    | 251 (2.2%)    | 295 (2.5%)    | 204 (2.1%)   | <0.001   |
| <b>Findings on angiography</b> |              |              |              |              |              |              |               |               |               |              |          |
| Left main/3-vessel disease**   | 357 (49.5%)  | 761 (44.5%)  | 981 (41.6%)  | 1082 (39.6%) | 1075 (37.8%) | 860 (35.2%)  | 775 (33.9%)   | 686 (33.3%)   | 528 (32.4%)   | 304 (32.2%)  | <0.001   |
| <b>In-hospital treatment</b>   |              |              |              |              |              |              |               |               |               |              |          |
| Intravenous inotrope           | 521 (9.6%)   | 843 (9.2%)   | 790 (7.1%)   | 700 (6.2%)   | 650 (5.8%)   | 621 (5.6%)   | 640 (5.5%)    | 653 (5.6%)    | 714 (6.1%)    | 620 (6.4%)   | <0.001   |
| Intravenous diuretic           | 2373 (43.7%) | 3526 (38.2%) | 4067 (36.3%) | 3597 (31.6%) | 3168 (28.1%) | 2824 (25.3%) | 2633 (22.7%)  | 2425 (20.8%)  | 2376 (20.2%)  | 1971 (20.3%) | <0.001   |
| <b>Medication at discharge</b> |              |              |              |              |              |              |               |               |               |              |          |
| Aspirin                        | 3831 (81.7%) | 7055 (87.2%) | 8770 (87.0%) | 9011 (86.9%) | 9305 (89.7%) | 9717 (93.4%) | 10217 (94.5%) | 10322 (95.5%) | 10374 (96.6%) | 8420 (94.3%) | <0.001   |
| Dual antiplatelet              | 0 (0.0%)     | 106 (1.3%)   | 935 (9.3%)   | 2461 (23.7%) | 5423 (52.3%) | 7976 (76.7%) | 9029 (83.5%)  | 9463 (87.6%)  | 9691 (90.3%)  | 7993 (89.6%) | <0.001   |
| Warfarin                       | 842 (18.1%)  | 1044 (13.1%) | 1003 (10.0%) | 834 (8.1%)   | 667 (6.5%)   | 498 (4.8%)   | 568 (5.3%)    | 605 (5.6%)    | 651 (6.0%)    | 723 (8.0%)   | <0.001   |
| Betablocker                    | 3659 (78.2%) | 6587 (81.7%) | 8621 (85.6%) | 9099 (87.9%) | 9235 (89.1%) | 9353 (89.9%) | 9824 (90.9%)  | 9914 (91.7%)  | 9911 (91.6%)  | 8176 (91.0%) | <0.001   |
| Calcium antagonist             | 550 (11.9%)  | 756 (9.5%)   | 956 (9.6%)   | 954 (9.4%)   | 843 (8.2%)   | 859 (8.3%)   | 948 (8.8%)    | 1072 (9.9%)   | 1100 (10.2%)  | 1011 (11.3%) | 0.056    |
| Digoxin                        | 445 (9.6%)   | 645 (8.1%)   | 669 (6.7%)   | 521 (5.1%)   | 421 (4.1%)   | 319 (3.1%)   | 268 (2.5%)    | 222 (2.1%)    | 184 (1.7%)    | 120 (1.3%)   | <0.001   |
| ACEi/ARB                       | 1907 (40.8%) | 3276 (40.9%) | 4477 (44.7%) | 5315 (51.7%) | 5975 (57.8%) | 7017 (67.4%) | 8193 (75.8%)  | 8883 (82.2%)  | 9240 (85.4%)  | 7656 (85.2%) | <0.001   |
| Diuretic                       | 1834 (39.4%) | 2993 (37.4%) | 3534 (35.3%) | 3553 (34.7%) | 3233 (31.3%) | 3093 (29.7%) | 2881 (26.7%)  | 2700 (25.0%)  | 2590 (23.9%)  | 1936 (21.5%) | <0.001   |
| Statin                         | 657 (14.2%)  | 2447 (30.6%) | 4653 (46.4%) | 6339 (61.7%) | 7588 (73.4%) | 8644 (83.1%) | 9548 (88.3%)  | 9893 (91.6%)  | 10017 (92.6%) | 8413 (93.6%) | <0.001   |
|                                |              |              |              |              |              |              |               |               |               |              |          |

Numbers are n(%) or median (interquartile range, IQR) as appropriate.

MI: myocardial infarction; PCI: Percutaneous coronary intervention; CABG: Coronary artery by-pass grafting; LVEF: Left ventricular ejection fraction; ACEi/ARB: Angiotensin-converting-enzyme inhibitor/angiotensin receptor blocker. \* p-values were tested with Jonckheere-Terpstra trend test for categorical variables and with linear-by-linear trend test for continuous data. \*\* This data contains a large proportion of missing >20%.

**Table S3. In-hospital, 30-day and 1-year outcomes**

|                            | 1995-1996 | 1997-1998 | 1999-2000 | 2001-2002 | 2003-2004 | 2005-2006 | 2007-2008 | 2009-2010 | 2011-2012 | 2013-2014        | P for trend |
|----------------------------|-----------|-----------|-----------|-----------|-----------|-----------|-----------|-----------|-----------|------------------|-------------|
| N                          | 5567      | 9450      | 11473     | 11657     | 11483     | 11259     | 11628     | 11663     | 11745     |                  |             |
| <b>In-hospital outcome</b> |           |           |           |           |           |           |           |           |           |                  |             |
| In-hospital death          | 13.60%    | 11.90%    | 11.10%    | 10.00%    | 8.90%     | 7.40%     | 6.90%     | 7.20%     | 7.90%     | 756/9749 (7.8%)  | <0.001      |
| In-hospital CV death       | 13.20%    | 11.50%    | 10.50%    | 9.50%     | 8.40%     | 6.90%     | 6.40%     | 6.60%     | 7.20%     |                  | <0.001      |
| In-hospital MI             |           | 2.90%     | 1.60%     | 1.70%     | 1.70%     | 1.40%     | 1.10%     | 1.00%     | 0.90%     |                  | <0.001      |
| In-hospital MI or death    |           | 13.90%    | 12.20%    | 11.20%    | 10.20%    | 8.40%     | 7.50%     | 7.90%     | 8.50%     |                  | <0.001      |
| In-hospital MI or CV death |           | 13.50%    | 11.70%    | 10.80%    | 9.60%     | 7.90%     | 7.00%     | 7.30%     | 7.90%     |                  | <0.001      |
|                            |           |           |           |           |           |           |           |           |           |                  |             |
| <b>30-day outcome</b>      |           |           |           |           |           |           |           |           |           |                  |             |
| Death                      | 15.80%    | 14.60%    | 13.20%    | 12.20%    | 10.90%    | 9.10%     | 8.40%     | 8.70%     | 9.40%     | 894/9749 (9.2%)  | <0.001      |
| CV death                   | 15.20%    | 13.90%    | 12.50%    | 11.50%    | 10.10%    | 8.30%     | 7.70%     | 7.90%     | 8.50%     |                  | <0.001      |
| MI                         |           | 4.90%     | 3.50%     | 4.00%     | 3.40%     | 2.70%     | 2.20%     | 1.70%     | 1.50%     |                  | <0.001      |
| MI or death                |           | 18.20%    | 16.10%    | 15.60%    | 13.80%    | 11.20%    | 10.10%    | 10.10%    | 10.70%    |                  | <0.001      |
| MI or CV death             |           | 17.70%    | 15.40%    | 14.90%    | 13.10%    | 10.50%    | 9.40%     | 9.30%     | 9.80%     |                  | <0.001      |
| Stroke                     | 0.60%     | 0.60%     | 0.50%     | 0.60%     | 0.60%     | 0.50%     | 0.60%     | 0.60%     | 0.50%     |                  | 0.86        |
| Stroke or death            | 16.30%    | 15.00%    | 13.60%    | 12.70%    | 11.40%    | 9.50%     | 9.00%     | 9.20%     | 9.90%     |                  | <0.001      |
| Heart failure              | 2.40%     | 2.30%     | 2.20%     | 2.00%     | 2.00%     | 2.10%     | 2.00%     | 2.00%     | 2.40%     |                  | 0.56        |
| Heart failure or death     | 18.00%    | 16.60%    | 15.30%    | 14.00%    | 12.80%    | 11.00%    | 10.30%    | 10.50%    | 11.50%    |                  | <0.001      |
|                            |           |           |           |           |           |           |           |           |           |                  |             |
| <b>1-year outcomes</b>     |           |           |           |           |           |           |           |           |           |                  |             |
| Death                      | 22.1%     | 20.5%     | 19.1%     | 18.4%     | 16.7%     | 14.6%     | 13.8%     | 13.7%     | 14.4%     | 688/4884 (14.1%) | <0.001      |
| CV death                   | 20.1%     | 18.6%     | 16.9%     | 16.0%     | 14.3%     | 12.0%     | 11.2%     | 11.0%     | 11.6%     |                  | <0.001      |
| MI                         |           | 11.5%     | 10.7%     | 10.9%     | 10.2%     | 8.5%      | 7.8%      | 6.7%      | 5.8%      |                  | <0.001      |
| MI or death                |           | 29.2%     | 27.6%     | 26.9%     | 24.8%     | 21.1%     | 19.7%     | 19.1%     | 19.1%     |                  | <0.001      |
| Stroke                     | 3.00%     | 2.9%      | 2.7%      | 2.8%      | 2.7%      | 2.6%      | 2.6%      | 2.3%      | 2.1%      |                  | <0.001      |
| Stroke or death            | 24.5%     | 22.7%     | 21.0%     | 20.5%     | 18.7%     | 16.5%     | 15.9%     | 15.5%     | 16.0%     |                  | <0.001      |



|                        |       |       |       |       |       |       |       |       |       |  |        |
|------------------------|-------|-------|-------|-------|-------|-------|-------|-------|-------|--|--------|
| Heart failure          | 7.8%  | 7.1%  | 6.6%  | 5.8%  | 5.6%  | 5.7%  | 5.5%  | 5.5%  | 6.2%  |  | <0.001 |
| Heart failure or death | 27.9% | 25.8% | 24.1% | 22.8% | 21.0% | 18.9% | 18.0% | 18.0% | 19.0% |  | <0.001 |

MI: Myocardial infarction; CV: Cardiovascular.

**Table S4. Standardized incidence rate ratio (SIR)**

The SIR of 1year total mortality for cases with ST-elevation myocardial infarction versus the general population was calculated based on the mortality rates of an age, sex and calendar (2-year block) matched general population from Statistics Sweden ([www.scb.se](http://www.scb.se)).

|                                       | 1995-1996        | 1997-1998        | 1999-2000        | 2001-2002        | 2003-2004        | 2005-2006        | 2007-2008        | 2009-2010        | 2011-2012        | 2013-2014        | P for trend |
|---------------------------------------|------------------|------------------|------------------|------------------|------------------|------------------|------------------|------------------|------------------|------------------|-------------|
| Number of deaths                      | 5567             | 9450             | 11473            | 11657            | 11483            | 11259            | 11628            | 11663            | 11745            | 4884             |             |
| Observed number of deaths             | 1231             | 1937             | 2191             | 2149             | 1916             | 1646             | 1600             | 1598             | 1692             | 688              |             |
| Expected number of deaths             | 222              | 365              | 462              | 478              | 446              | 434              | 431              | 424              | 450              | 184              |             |
| Standardized incidence ratio (95% CI) | 5.54 (5.24-5.86) | 5.30 (5.07-5.54) | 4.74 (4.55-4.94) | 4.49 (4.31-4.69) | 4.29 (4.10-4.49) | 3.79 (3.61-3.98) | 3.71 (3.53-3.90) | 3.77 (3.59-3.96) | 3.76 (3.58-3.94) | 3.74 (3.47-4.03) | <0.001      |

**Table S5. Standardized 1-year risk of death, myocardial infarction, and death or myocardial infarction.**

Adjusted model for age, gender, and baseline characteristics and reperfusion strategies (see details below table)\*. For details on modeling and interpretation, see below\*\*.

| Years     | Death    |              | MI       |              | Death or MI |              |
|-----------|----------|--------------|----------|--------------|-------------|--------------|
|           | Observed | Standardized | Observed | Standardized | Observed    | Standardized |
| 1995-1996 | 22.1     | 16.4         | -        | -            | -           | -            |
| 1997-1998 | 20.5     | 15.9         | 11.5     | 9.6          | 29.2        | 23.5         |
| 1999-2000 | 19.1     | 14.7         | 10.7     | 9.0          | 27.6        | 22.1         |
| 2001-2002 | 18.4     | 14.2         | 10.9     | 9.1          | 26.9        | 21.6         |
| 2003-2004 | 16.7     | 13.6         | 10.2     | 9.0          | 24.8        | 21.1         |
| 2005-2006 | 14.6     | 13.1         | 8.5      | 8.1          | 21.1        | 19.6         |
| 2007-2008 | 13.8     | 13.3         | 7.8      | 7.8          | 19.7        | 19.5         |
| 2009-2010 | 13.7     | 13.5         | 6.7      | 6.7          | 19.1        | 19.2         |
| 2011-2012 | 14.4     | 14.2         | 5.8      | 5.8          | 19.1        | 19.1         |
| 2013-2014 | 14.1     | 14.1         | -        | -            | -           | -            |

\*Adjustments were made as follows: Age (3 knots, restricted cubic spline) and gender, baseline characteristics (diabetes, hypertension, previous myocardial infarction, previous peripheral vascular disease, previous stroke, any previous stroke, previous congestive heart failure, previous chronic obstructive pulmonary disease, cancer within 3 years, presence of any pulmonary rales on admission, atrial fibrillation on admission, medication on admission (antiplatelet therapy, beta-blocker, angiotensin-converting-enzyme inhibitor/angiotensin-receptor-blocker, statin) and in-hospital intervention for STEMI: reperfusion therapy and primary percutaneous coronary intervention.

\*\* As an example of how the standardized mortality was obtained, the myocardial infarction cases admitted during the last 2-year period (2013-2014) were extracted from the main dataset. Admission year for these cases was changed to an earlier time-period (e.g. 1996-1997). The predicted probabilities of one-year mortality were computed per case. The average of these probabilities was computed, which was the standardized mortality for this imputation. The above-described steps were repeated for each imputation and the standardized mortality averaged over 5 imputations. The standardized mortality can be interpreted as the mortality that we would expect to see in the 2013-2014 cohort, had they been admitted in a different time-period.
